# Supplementary material for: PPARG Binding Landscapes in Macrophages Suggest a Genome-Wide Contribution of PU.1 to Divergent PPARG Binding in Human and Mouse
Source: PubMed Central journal article supplement (PMC3485280; doi:10.1371/journal.pone.0048102), 2012-10-31
Supplement: pone.0048102.s007.pdf [file pone.0048102.s007.pdf]

| <b>Library</b> | <b># lanes</b> | <b># sequenced tags</b> |          |
|----------------|----------------|-------------------------|----------|
| PPARg          |                | 3                       | 10232113 |
| RXR            |                | 1                       | 12132706 |
| IgG            |                | 1                       | 13687635 |
| PU.1           |                | 1                       | 13429572 |

Data are deposited at GEO as SuperSeries under the accession number GSE25608
