# Supplementary material for: PPARG Binding Landscapes in Macrophages Suggest a Genome-Wide Contribution of PU.1 to Divergent PPARG Binding in Human and Mouse
Source: PLoS One. 2012 Oct 31;7(10):e48102. doi: 10.1371/journal.pone.0048102 (PMC3485280; doi:10.1371/journal.pone.0048102)
Supplement: Table S5 — Rosiglitazone responsive genes in THP-1 cells. Genes identified as RSG responsive in a time course experiment in PMA-differentiated THP-1 cells. Listed are Symbols, Illumina Probe IDs and fold change of RSG treated samples compared to vehicle (DMSO) treated samples for each time point. Fold change is shown as the log2 ratio. Listed genes show a fold change >1.5 for at least one time point. (XLSX) [file pone.0048102.s010.xlsx]

## Sheet:  Expression data (THP-1)
ProbeID	Symbol	1.5h	3h	8h	12h
270615	ABCC3	0.0761037	0.460713	0.824663	1.04069
5860377	ABCG1	0.566856	0.795508	3.32963	2.47267
3120014	ABHD4	-0.0358672	0.032145	-0.602211	-0.451485
2350747	ABLIM3	-0.0706125	0.177049	-0.169997	-0.843738
1450093	ACAA2	0.134625	0.14272	0.348839	0.475908
3370136	ACAD11	-0.122874	-0.0216234	-0.770016	-0.831509
2680725	ACPP	-0.0636013	0.131936	-0.508945	-0.847834
1030431	ACSL1	-0.100373	0.252761	0.668984	0.555979
7040286	ACSL5	0.0413522	0.101881	0.272293	0.24964
4610431	ACTG2	0.0474902	-0.113142	-0.202964	-1.33626
7550092	ACTL7B	0.583619	0.625235	0.978416	0.929744
3440452	ADAM15	0.0534996	0.0921296	0.19673	0.549885
6900209	ADAM19	0.127936	-0.0565837	-1.04092	-0.994078
580561	ADCY1	0.149448	0.350452	1.00213	0.985204
460204	ADFP	0.955948	0.850924	1.60335	1.73745
4890255	AGMAT	0.244424	-0.07727	0.677392	1.32907
7160121	AGRP	0.360955	0.593022	2.36737	2.94105
5340129	AKR1C2	-0.191491	0.72377	1.74811	2.66227
7210632	AKR1C3	-0.0965429	0.443945	1.9287	2.02161
510687	ALDH1A2	0.0159092	0.135185	0.558254	1.05836
4610433	ANGPTL4	2.11066	1.32064	1.98016	2.24403
2470064	AQP8	0.622637	0.718356	3.38337	1.66359
160494	AQP9	0.331116	-0.101548	0.508964	0.881369
510520	ARHGAP22	0.177091	-0.118726	-0.495004	-0.627116
7400102	ASPHD2	0.0112658	-0.0492329	-0.40527	-0.512601
4780128	ATF3	0.23377	0.327988	0.370104	0.532386
2140121	BASP1	-0.00353065	-0.018343	-0.273618	-0.352352
4070053	BCAR3	0.655409	0.668075	0.825324	0.837156
5290634	BCL2L12	0.115476	0.363175	0.328313	0.496361
650553	BIN1	-0.00397216	0.0337667	-0.512927	-0.898058
5130440	BIN1	0.0352679	0.00524143	-0.481865	-1.04941
6620521	BLVRB	-0.0459814	0.171803	0.510438	0.677937
4200746	BPI	0.126253	0.0109659	-0.533441	-0.880289
1010487	BTG2	-0.167437	-0.179073	-0.572967	-0.474634
1030278	C10ORF33	-0.0745995	-0.0310865	-0.322796	-0.825081
6110195	C10ORF56	-0.0352004	-0.0986443	-0.234213	-0.505933
7050719	C1ORF162	0.201844	0.186516	0.364412	0.578287
940010	C22ORF16	0.268018	0.294339	0.845469	0.863781
2510224	C2ORF26	0.866771	0.78444	1.43424	1.59761
840068	C3AR1	-0.0808752	-0.141438	-0.807716	-0.847387
940471	C5ORF13	-0.0916966	-0.0172725	-0.450844	-0.504274
780500	CAB39L	-0.180862	-0.137028	-0.520435	-0.497988
3870441	CAPN3	0.0640917	0.220732	0.373888	0.20406
1070215	CAV1	0.232226	0.388694	1.33359	0.911512
7320301	CCR1	-0.205493	-0.0496881	-0.317822	-0.692627
1500725	CD1C	0.117329	-0.0697287	-0.455196	-0.819533
1010592	CD36	0.216018	0.409914	1.33456	1.501
3310538	CD36	0.00979111	0.329515	1.02941	1.15163
6960630	CD97	-0.00308707	-0.00316161	-0.542356	-0.468777
1470626	CD97	0.0957737	0.0994111	-0.526123	-0.873135
1070047	CDC42EP4	0.547964	0.488144	0.429961	0.750122
20446	CEBPB	0.337548	0.283464	0.266615	0.316876
7550112	CITED2	-0.201175	-0.0505434	-0.364713	-0.582056
4150066	CKB	0.266349	-0.00605746	-0.447475	-0.878212
3930424	CLIC6	0.0845717	0.28461	0.411648	0.380589
780711	CMYA1	-0.378899	-0.132104	-1.20888	-2.72659
4010152	CNR1	0.0947969	0.386808	0.529512	0.313162
5090026	COL15A1	0.149284	0.111653	-0.643944	-0.742167
5910431	COL4A1	0.076159	0.127313	0.582003	0.816076
1410609	CORO2A	0.127044	0.380941	0.456842	0.683099
1430187	CSTB	0.131819	0.0182464	0.304908	0.392053
6200066	CUL3	0.0968854	-0.425257	-0.220018	-1.44949
6450066	CUTL2	-0.0791611	0.232682	-0.789307	-1.01219
2070168	CX3CR1	-0.316943	-0.167501	-0.751013	-0.910362
870161	CXADR	-0.341881	-0.431027	-0.741014	-1.34147
6760487	CXXC6	-0.112845	-0.229585	-0.189417	-1.98636
3520241	DACT1	0.377681	0.308217	0.807476	1.06648
1510553	DACT1	0.126808	0.624069	1.2776	0.813672
3190148	DDIT4	0.1119	-0.00388144	-0.654814	-0.840177
4920040	DEFB1	0.141064	0.120097	0.620839	0.633851
3450537	DGAT2	0.418871	0.217047	0.413383	0.973132
7040670	DHRS3	0.259672	0.282422	0.412529	0.373621
630315	DHRS9	0.0981808	-0.0316229	0.28459	0.521927
6980280	DNAJC5B	-0.185754	0.332954	2.29931	1.92395
2060678	DND1	1.09717	0.68323	1.67468	1.67533
1240369	DOK2	0.351586	0.123712	0.550994	1.01989
4290431	DPYSL3	0.12345	0.261897	0.824921	0.669688
620239	DSCR1	0.550309	0.174869	1.51467	2.3109
2850551	DSCR1	0.284653	0.514354	1.30017	1.50255
4220187	DYSF	0.224977	0.161571	0.810125	1.21863
4040037	EBI2	-0.3486	-0.296112	-0.942332	-0.489496
5360553	ECH1	0.099998	0.131667	0.382114	0.482036
5220612	ECHDC3	-0.202728	0.0370221	-0.651049	-0.482329
160754	EDG1	-0.0173726	-0.401283	-0.582566	-0.948172
2140136	EMR2	0.0177791	0.062392	-0.290869	-0.461597
3170132	ENAH	0.206522	0.348542	0.493332	0.564767
5550279	ENTPD1	0.0707913	0.0438933	-0.471272	-0.30583
2690458	EXO1	0.122502	0.440635	0.269801	0.805745
4220431	EXT1	-0.0440999	0.0213702	-0.427111	-0.755743
150373	FABP4	0.304813	0.217497	1.51667	2.2623
4200541	FAM113B	0.279477	0.250306	0.137252	0.329581
6860347	FAM46C	-0.373373	-0.0298401	-0.365872	-0.569515
60014	FAM84B	0.745939	0.678348	1.22304	0.986056
4040242	FAM89A	0.464516	0.316562	0.656436	0.852224
7400747	FAM89A	0.446403	0.487944	0.778977	0.656746
4920228	FFAR2	0.147079	0.353076	0.66985	1.60507
1430403	FGD4	-0.263295	-0.404586	-0.552089	-1.11633
6660475	FGR	0.125316	0.225695	1.07917	1.09041
360619	FGR	0.233505	0.211013	0.971662	1.0175
4640446	FHL1	0.220114	0.278217	1.05019	1.44792
1300670	FHOD3	0.429719	0.567724	2.11655	1.9688
3830768	FLJ10159	0.199498	0.297115	0.641618	0.796445
4670414	FLJ11000	0.426673	0.523757	0.650138	0.751267
1780259	FLJ20647	0.00630216	0.216972	0.664954	0.667867
20154	FLJ36748	0.204204	0.593464	1.23372	1.0071
5900367	FLJ41603	0.609998	-0.240951	-2.8976	-1.87779
4900747	FN5	0.286841	0.235691	0.554799	0.876664
1770008	FRMD4A	0.00748187	0.390701	0.326803	0.406312
5720180	FZD2	0.11857	-0.227339	-0.444367	-0.748639
6420465	GABARAPL1	-0.149145	0.0423838	-0.402669	-0.314592
6560458	GALNTL1	0.0899752	0.344664	0.79051	0.739372
70730	GAS6	0.123042	0.0612386	-0.27985	-0.558822
3610707	GCOM1	0.211554	0.476568	0.820593	1.24493
4490072	GFRA2	0.129479	0.313007	0.319249	0.440084
7320193	GHRL	0.0594692	0.0458493	-0.302455	-0.643156
6330615	GIMAP6	-0.0407678	-0.0417888	-0.188465	-0.376335
1190040	GIMAP8	-0.119176	-0.0299705	-0.442503	-0.656476
670348	GPA33	0.441597	0.466044	1.14446	1.80693
6330270	GPC4	0.147739	0.320136	0.836435	0.957448
4120224	GPR18	-0.198542	-0.15731	-0.9442	-0.710819
2510270	GPR34	-0.827372	0.487333	-2.75732	-3.7477
6520328	GPR35	0.496559	0.264116	0.76739	0.902676
1660184	GPR88	-0.289802	-1.11156	-1.76096	-1.24155
2600382	GPX4	0.0537723	0.101866	0.266147	0.419301
6520128	GPX4	0.0183833	0.110252	0.311199	0.27722
2060477	HMFN0839	0.101622	0.304447	0.880715	0.940386
2510593	HRASLS3	0.133557	0.216394	0.763393	0.969154
730156	ICAM2	0.152792	0.186314	0.614591	0.63736
130360	IDS	0.0378315	0.0102349	-0.261542	-0.349934
3850202	IGSF6	-0.141788	-0.3265	-0.657818	-0.935668
2340241	IMPA2	-0.0186982	0.287148	0.457811	0.571129
510739	INPP5A	0.022561	0.122903	-0.28274	-0.494626
6180133	ITPR3	0.0666987	0.536321	0.925803	1.22434
2470554	KCNE1	-0.036436	0.846252	2.67937	2.42071
990112	KCNK13	0.329989	0.464394	0.766942	1.01464
1990494	KIAA0274	0.0841114	0.185558	0.305911	0.318103
110181	KIAA1199	-0.128812	-0.00543022	-0.271118	-1.47097
6550209	KIF2	0.182965	0.349128	0.395771	0.423489
870112	KIF25	0.408184	-0.578477	-2.42575	-2.77809
5700088	KLF11	0.355797	0.300797	0.368258	0.611474
2810059	KLF4	0.912645	0.824438	1.0794	0.807055
5550341	KLRC1	0.0611598	1.08395	3.93904	2.72562
6620392	LFNG	0.700312	0.72276	1.54615	1.43604
1820114	LILRB4	0.0743712	0.131602	-0.48162	-0.557804
770736	LOC338328	0.0514463	-0.648343	-1.2874	-1.6758
4260309	LOC375449	-0.0300158	-0.0546004	0.778551	0.930892
7150292	LOC388610	0.338536	0.465218	1.27229	1.50545
2450504	LONRF3	0.199729	0.295195	0.492821	0.561165
4150477	LOXL4	-0.210245	-0.0772198	-0.51599	-0.672348
7150324	LRMP	-0.107456	-0.0355172	-0.603507	-0.775481
3170703	LY9	0.136534	0.0807692	-0.26873	-0.830397
1470215	MAP3K8	0.512738	0.553293	0.792598	1.13434
60349	MAPK13	0.11997	0.130005	0.305788	0.429864
4610113	Mar.05	-0.950695	-0.439263	-1.41799	-1.36183
1070367	MCEMP1	0.062801	0.20252	0.288946	0.285798
3800279	ME3	0.174718	0.199969	0.576037	0.74331
1340326	MEI1	0.0551646	-0.207389	-0.267294	-0.82924
5080131	MGST1	0.0210477	0.181065	0.435216	0.556588
1510019	MGST2	0.101706	0.112761	0.338028	0.447471
730372	MMP19	0.742107	0.425807	0.654143	1.01122
3800017	MTUS1	0.0875244	0.293611	0.760759	0.796771
2970594	MYADM	-0.455451	-0.153978	-1.95461	-1.16008
4210411	NDRG2	0.0724661	0.232209	0.100425	0.602505
4200692	NEU1	-0.0444765	0.0412756	-0.227857	-0.302111
940725	NFATC1	-0.0959645	-0.177825	-0.782058	-0.681537
1400348	NMUR1	1.27773	1.47177	2.83599	2.82683
2900373	NPAS1	-0.107114	0.153782	-0.724324	-0.90311
6100468	NPTX1	0.0887631	-0.144456	-0.54656	-0.860305
3710450	NR1H3	0.0541728	0.243193	0.510338	0.901824
3850167	NUDT3	0.0438699	-0.0630181	-0.150976	-0.217334
2370291	OACT5	0.520755	0.233598	0.880437	0.911963
1980598	OLIG2	-0.175918	-0.256827	-0.768132	-0.937295
1820450	OSCAR	-0.0388382	0.0171797	-0.321561	-0.555714
6110487	PACSIN3	0.34546	0.399016	0.800403	1.17173
6420424	PAICS	-0.129755	0.294295	0.276595	0.303242
4810445	PCOLCE2	-0.033889	0.185386	0.500136	0.589127
130156	PDE1B	0.197054	0.456526	1.19791	1.07609
830563	PDE9A	0.165629	0.517119	1.15812	1.05729
7200168	PDGFRL	0.152381	0.357816	0.952869	1.20244
3310504	PDK4	3.66682	2.39596	4.20036	4.12291
5890131	PDXK	0.0886957	0.385073	0.418983	0.357253
730082	PERF15	-0.214698	1.94254	2.76849	2.11536
2750025	PEX19	0.154596	0.220448	0.317646	0.257376
2360452	PFKP	0.049659	0.0578955	-0.513813	-0.581137
1940438	PGF	1.20185	1.39299	1.07191	2.67067
3520743	PHLDA3	1.11386	0.913192	1.25415	1.56411
2490372	PLAC8	0.0207664	0.210339	0.481653	0.482007
6330187	PLS1	-0.0246453	0.0817753	0.927329	0.710063
5690519	PLTP	0.14555	0.205993	0.510043	0.672402
7560138	PMP22	-0.171392	-0.0852247	-0.952543	-0.486955
1850092	PODXL	0.23592	0.373662	0.948081	1.11973
6380338	POLB	-0.202696	-0.0305121	-0.330433	-0.484681
1050097	POU3F1	1.465	-0.183696	2.1786	3.08358
5490437	PPP1R14C	0.0719327	0.216495	0.198922	0.550869
290181	PROCR	-0.013345	0.199554	-0.429127	-0.656982
1030026	PRR6	0.245275	0.169345	0.505441	0.567581
5490689	PVALB	-0.535722	-0.220321	1.53319	2.31969
5910215	RAD51C	-0.0847145	0.0344071	0.14916	0.358214
7050600	RARA	0.484508	0.421675	0.588021	0.78772
3850112	RBP7	1.10017	0.50833	2.72625	2.95809
7050433	RDH10	0.248056	0.51036	0.937233	1.04991
4210524	RND3	0.843817	0.565824	0.893604	1.04972
5360424	RPS6KA2	0.0251803	-0.00671664	-0.472159	-0.499923
1500088	RPS6KA2	0.0620671	-0.186819	-0.812271	-1.38104
4810435	SCARB2	0.0639759	0.156445	0.327289	0.366635
2650193	SDC4	0.224911	0.400137	0.336792	0.682099
5290253	SERHL	0.144828	0.438459	0.767236	0.814871
1240553	SESN1	-0.165806	0.163022	-0.367017	-0.497537
7200044	SH3BGRL2	-0.23978	0.214059	0.693133	0.69485
10767	SHANK3	0.263294	0.674962	1.70936	1.37836
4280053	SIT1	-0.395118	-0.518856	-1.13868	-0.439257
290669	SLC1A7	0.789446	0.69253	0.776219	1.81361
2340441	SLC22A18AS	0.0445163	-0.0591997	-0.260993	-0.597682
1430286	SLC25A20	0.142789	0.128476	0.691863	1.0228
3800168	SLC2A3	-0.00805507	-0.0103154	-0.202672	-0.521422
6580441	SLCO2B1	0.211407	0.495908	0.838677	0.884503
7100382	SPSB1	0.358868	0.586226	0.631125	0.496049
4260278	ST14	0.016055	0.186734	0.346638	0.469897
5260403	ST3GAL5	-0.0121633	0.0133928	-0.220088	-0.404829
1260524	STIM1	0.0695655	0.273664	0.312998	0.491662
2760653	STK38L	-0.268944	-0.100995	-0.411428	-0.533787
3460707	STMN1	0.103862	0.166153	0.123551	0.681897
1770168	SUSD3	-0.03129	-0.0287147	-0.413748	-0.326964
2680021	TBC1D2	0.254321	0.323418	0.46391	0.707926
1030008	TGFB3	-0.144999	0.0701497	-0.218452	-1.25314
2600164	THBS2	-0.315554	-0.32384	-1.11407	-1.44452
1500180	TLR4	0.908657	0.846831	0.848352	1.06167
830440	TLR5	-0.416091	-0.391332	-2.03817	-2.15574
7200753	TLR7	-0.163743	-0.240244	-1.11389	-1.19154
270703	TMEFF2	0.0982973	0.954675	0.823923	1.59136
3460008	TMEM173	-0.0991393	0.00909515	-0.380375	-0.52489
6280520	TMEM45A	-0.104139	0.116318	0.597117	0.574944
3780092	TNFRSF21	0.388773	0.491933	0.836123	0.875142
7150349	TPD52L1	0.174589	0.561882	1.76099	1.85868
2650553	TPD52L1	0.23844	0.312036	1.50682	1.61212
610519	TPM1	-0.162859	-0.00211254	-0.413817	-0.435889
5560246	TPM1	-0.151458	0.0440993	-0.369069	-0.447043
7510719	TRAF3IP2	0.357931	0.314944	0.4647	0.654949
6350446	TSC22D3	-0.154871	-0.166975	-0.497203	-0.440129
3830193	TSPAN12	0.780937	1.32115	2.96357	2.24553
620725	UCK2	0.059317	0.307251	0.390573	0.307013
5390661	VLDLR	0.542648	0.753748	1.4755	1.44048
6420113	VMP	0.0381368	0.312051	0.577164	0.480053
3400598	WIPI1	0.117887	0.0418516	-0.303065	-0.42502
4850370	WNT5B	0.0363388	-0.0291039	-0.76697	-0.615914
3190129	XAGE1	-0.120148	-0.146375	-0.386626	-0.30123
